# Supplementary figures and images for: Complement Activation Induces Neutrophil Adhesion and Neutrophil-Platelet Aggregate Formation on Vascular Endothelial Cells
Source: PubMed Central journal article supplement — Kidney Int Rep. 2016 Aug 31;2(1):66–75. doi: 10.1016/j.ekir.2016.08.015 (PMC5678626; doi:10.1016/j.ekir.2016.08.015), 2016-08-31

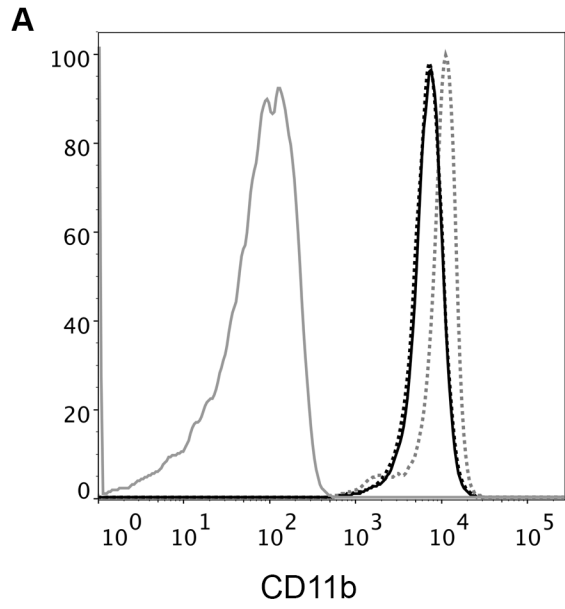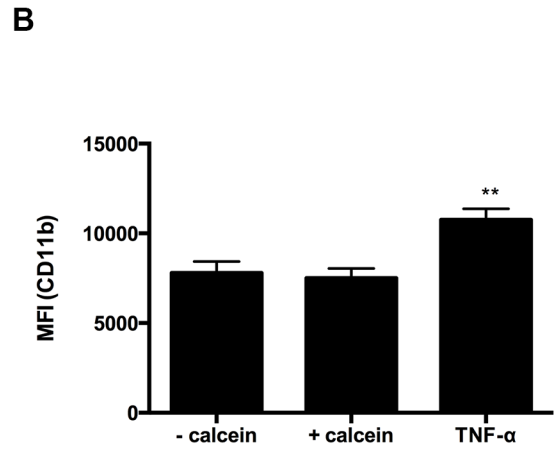

Supplement: mmc1.pdf [file mmc1.pdf]

**A**

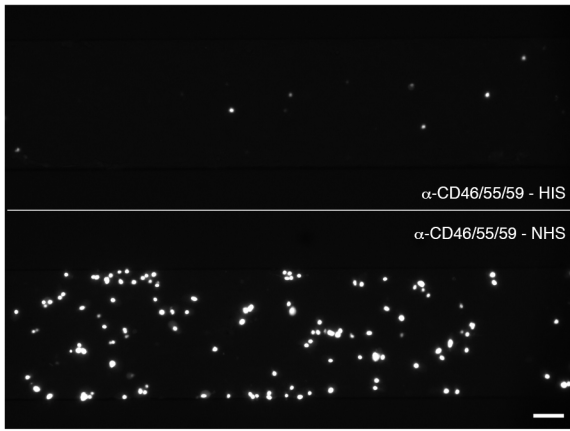

**B**

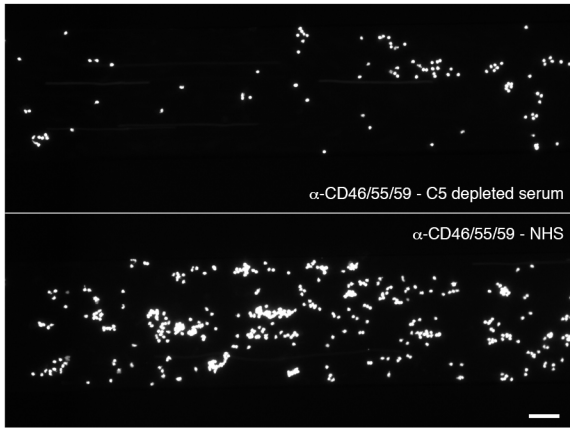

Supplement: mmc2.pdf [file mmc2.pdf]
